# Supplementary material
Source: PubMed Central journal article supplement (PMC5142759)
Supplement: NIHMS829873-supplement-Supplemental_Figures.pdf [file NIHMS829873-supplement-Supplemental_Figures.pdf]

## Supplementary Materials for

### **Donor exosomes rather than passenger leukocytes initiate alloreactive T cell responses after transplantation**

Jose Marino, Mohamed H. Babiker-Mohamed, Patrick Crosby-Bertorini, Joshua T. Paster, Christian LeGuern, Sharon Germana, Reza Abdi, Mayuko Uehara, James I. Kim, James F. Markmann, Georges Tocco, Gilles Benichou\*

Corresponding author. Email: [gbenichou@partners.org](mailto:gbenichou@partners.org)

Published 14 July 2016, *Sci. Immunol.* **1**, aaf8759 (2016)  
DOI: 10.1126/sciimmunol.aaf8759

#### **This PDF file includes:**

- Fig. S1. Sensitivity of imaging flow cytometry.
- Fig. S2. Markers expressed by cross-dressed cells after heart transplantation.
- Fig. S3. Detection of donor MHC class I mRNA.
- Fig. S4. Gating strategy used in imaging flow cytometry.
- Fig. S5. Kinetics of alloresponse by T cells after skin transplantation.
- Fig. S6. Cross-dressing results obtained with skin-grafted mice.
- Fig. S7. Activation of allospecific T cells by allogeneic exosomes and allo-MHC cross-dressed cells.

Figure S1. Sensitivity of Imaging flow cytometry.

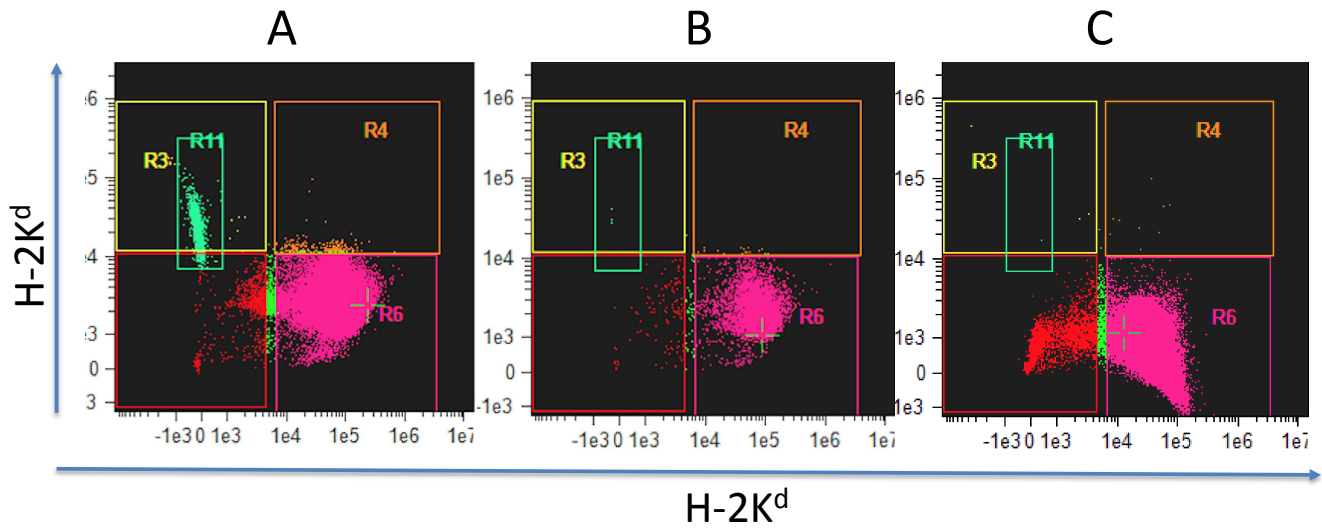

Different proportions of B6 cells were mixed with cells originated from BALB/c mice (Panel A: 1:100, Panel B: 1:100000, Panel C: 1:500000), labeled with anti-H-2K<sup>d</sup> (APC, X axis) and anti-H-2K<sup>b</sup> (FITC, Y axis). R3 represents the region of events tagged with anti-H-2K<sup>b</sup>, R11 represents the number of viable cells expressing H-2K<sup>b</sup>.

Figure S2. Markers expressed by cross-dressed cells after heart transplantation.

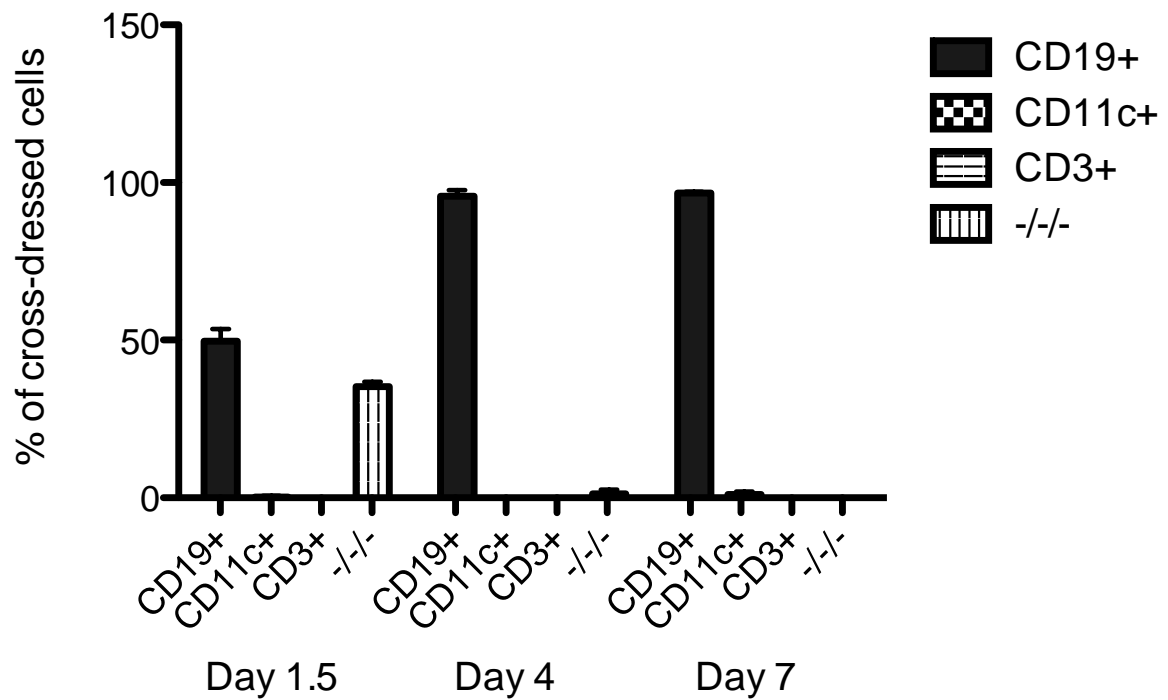

Spleen cells of B6 mice recipient of a BALB/c heart allograft were collected at different time points after transplantation. Recipient cells (H-2K<sup>b</sup>+) cross-dressed with donor MHC class I K<sup>d</sup> were stained with the following fluorochrome-bound antibodies: anti-CD3-Pacific Blue (for T cells), anti-CD19-PE (for B cells) and anti-CD11c-PECy7 (for dendritic cells). The results are representative of 3-6 mice tested individually at each time point.

Figure S3. Detection of costimulatory molecules on donor exosomes that cross-dress recipient cells.

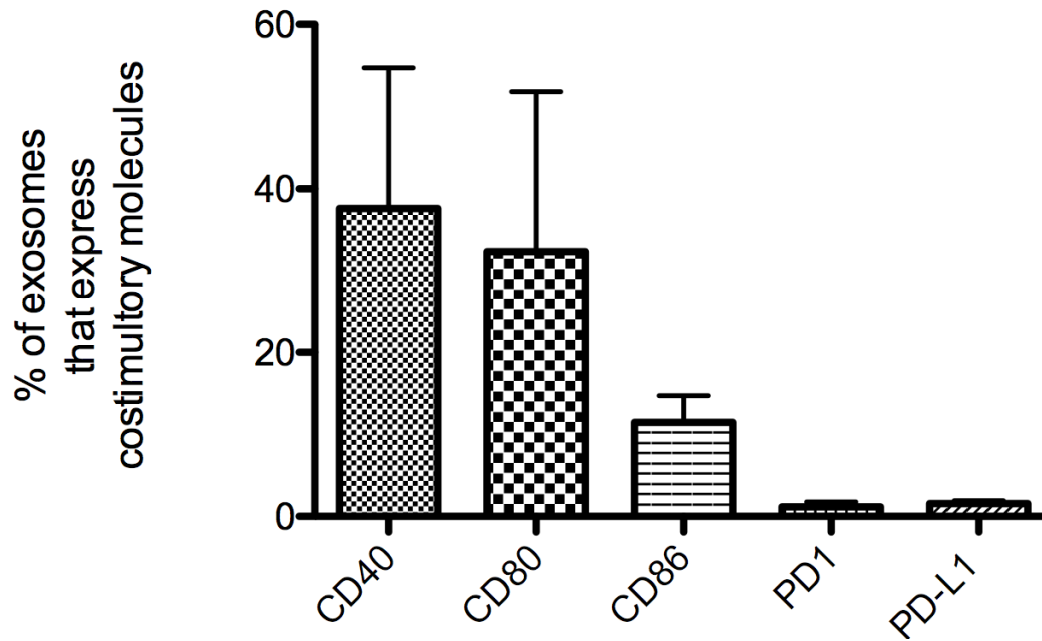

Lymph node cells (ipsilateral axillary and brachial LNs) from B6 mice recipient of a BALB/c skin allograft were collected at different time points after transplantation. The donor vesicles that were bound to recipient cells were stained with anti-CD40, anti-CD80, anti-CD86, anti-PD1 and anti-PD-L1 antibodies and analyzed by imaging flow cytometry.

Figure S4. Detection of donor MHC class I mRNA.

ORIGINAL AUTORADIOGRAPHY OF GELS PROBED WITH <sup>32</sup>P- PROBE.  
Figure 3 C and D

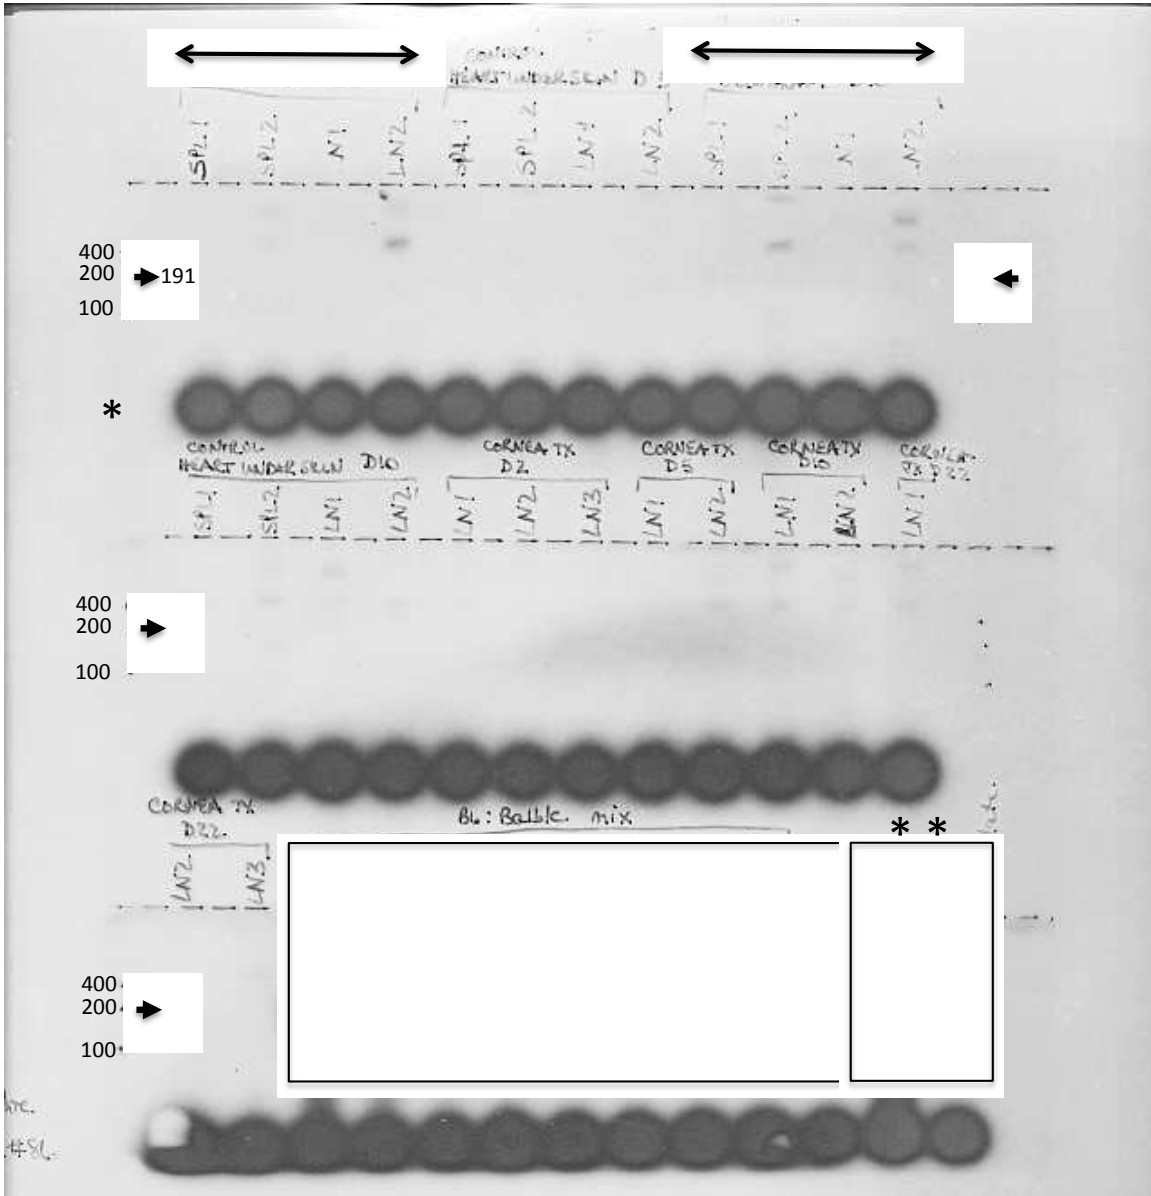

Two-day exposure autoradiograph of RT-PCR analysis of splenocytes (SPL) and lymph nodes (LN) from recipients of various B6 → BALB/c graft combinations. Skin graft alone (Control SG) at Day 5 and Day 10; Heart under skin (Control Heart under Skin) day 5 and day10 and cornea (Cornea Tx) at Day 2, 5, 10 and 22. Expected amplified band is at 191 bp (arrow head). Double head arrow and boxes indicate the portions of autoradiograph selected in Figure 3D and 3C, respectively. Because of overexposure, control data from the second box (\*\*) were from an overnight exposure. Dark band at bottom of gel ( \* ) corresponds to excess <sup>32</sup>P-probe.

Figure S5. Gating strategy used in imaging flow cytometry.

## Gating strategy (AMNIS)

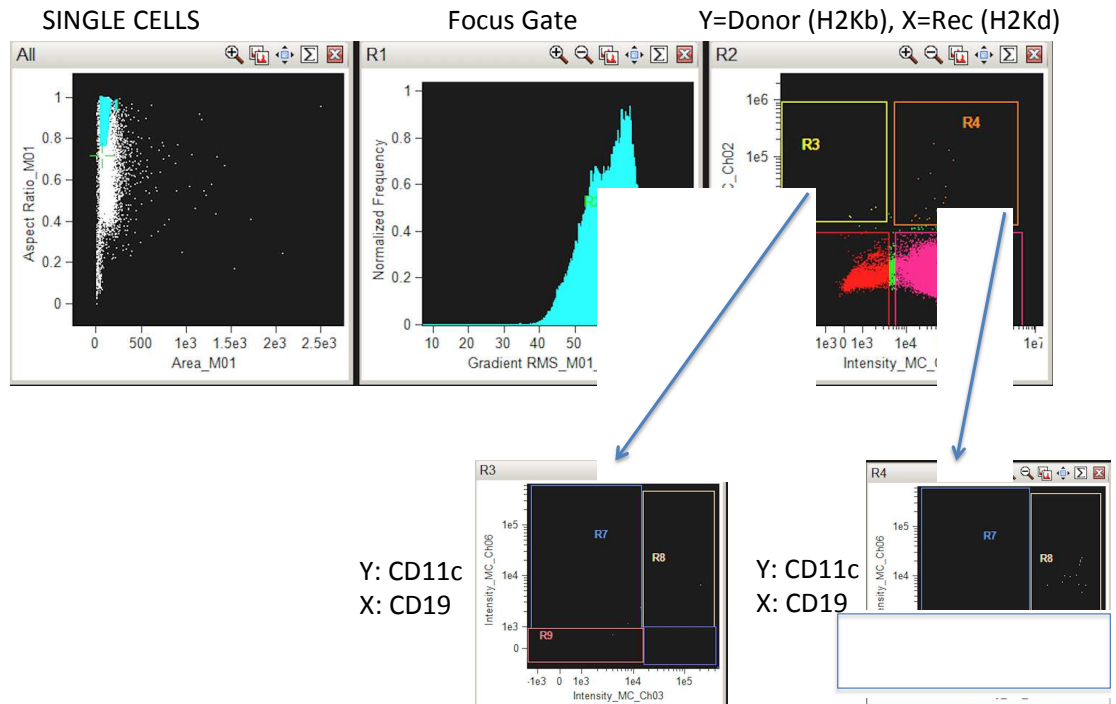

Analysis gates were based on aspect ratio, area and the root mean square of the rate of change of the image intensity profile of the bright field image for each event, using this strategy, events that corresponded to non-cellular events or debris as well as out-of-focus images were gated out of the analysis. Subsequent gates were based on the intensity of the fluorescence associated to each event and it's morphological distribution in the cell.

Figure S6. Kinetics of alloresponse by T cells after skin transplantation.

| Expt # 1 | Days post-transplantation | No graft |     |     | Syngeneic skin graft |     |     | Allogeneic skin graft |      |      |
|----------|---------------------------|----------|-----|-----|----------------------|-----|-----|-----------------------|------|------|
|          |                           |          |     |     |                      |     |     |                       |      |      |
| Expt # 1 | 2                         | 89       | 123 | 65  | 134                  | 176 | 98  | 598                   | 764  | 632  |
|          | 4                         | 112      | 67  | 80  | 78                   | 90  | 112 | 865                   | 998  | 765  |
|          | 6                         | 145      | 110 | 98  | 65                   | 134 | 187 | 998                   | 1025 | 1113 |
|          | 8                         | 45       | 97  | 76  | 88                   | 94  | 111 | 987                   | 1231 | 1123 |
|          | 10                        | 127      | 67  | 87  | 78                   | 91  | 159 | 1034                  | 1432 | 1248 |
| Expt # 2 | 2                         | 56       | 98  | 96  | 199                  | 214 | 122 | 432                   | 389  | 511  |
|          | 4                         | 78       | 67  | 78  | 132                  | 187 | 176 | 765                   | 654  | 620  |
|          | 6                         | 90       | 76  | 64  | 91                   | 101 | 156 | 765                   | 891  | 875  |
|          | 8                         | ND       | 112 | 60  | 75                   | 145 | 149 | 1287                  | 1236 | 998  |
|          | 10                        | 124      | 132 | 99  | 87                   | 98  | 112 | 1245                  | 1543 | 1124 |
| Expt # 3 | 2                         | 145      | 134 | 145 | 123                  | 122 | 176 | 321                   | 540  | 432  |
|          | 4                         | 111      | 98  | 88  | 192                  | 114 | 98  | 455                   | 517  | 489  |
|          | 6                         | 97       | 143 | 74  | 201                  | 145 | 125 | 672                   | 784  | 653  |
|          | 8                         | 134      | 154 | 135 | 129                  | 164 | 127 | 998                   | 764  | 872  |
|          | 10                        | 89       | 122 | ND  | ND                   | 148 | 163 | 1679                  | 1244 | 1476 |

  

| Expt # 1 | Day of skin graft removal | Medium |   |   | Syngeneic APCs |   |   | Allogeneic APCs |     |     |
|----------|---------------------------|--------|---|---|----------------|---|---|-----------------|-----|-----|
|          |                           |        |   |   |                |   |   |                 |     |     |
| Expt # 1 | No Graft                  | 2      | 4 | 5 | 1              | 3 | 2 | 211             | 125 | 199 |
|          | Day 2                     | 3      | 4 | 7 | 1              | 2 | 4 | 432             | 670 | 398 |
|          | Day 6                     | 1      | 0 | 0 | 1              | 0 | 0 | 654             | 876 | 987 |
|          | Day 9                     | 2      | 1 | 0 | 0              | 2 | 0 | 789             | 854 | 910 |
| Expt # 2 | No Graft                  | 0      | 0 | 2 | 2              | 1 | 0 | 97              | 88  | 112 |
|          | Day 2                     | 0      | 0 | 0 | 4              | 1 | 1 | 324             | 212 | 230 |
|          | Day 6                     | 1      | 0 | 0 | 2              | 2 | 0 | 431             | 378 | 478 |
|          | Day 9                     | 0      | 0 | 0 | 3              | 1 | 2 | 567             | 499 | 698 |
| Expt # 3 | No Graft                  | 0      | 0 | 1 |                |   |   |                 |     |     |
|          | Day 2                     | 0      | 0 | 0 | 0              | 0 | 2 | 54              | 77  | 105 |
|          | Day 6                     | 1      | 0 | 2 | 2              | 2 | 0 | 257             | 321 | 209 |
|          | Day 9                     | 2      | 0 | 0 | 3              | 4 | 0 | 524             | 621 | 709 |

**Top Table.** C57Bl/6 (B6, H-2<sup>b</sup>) mice received a skin graft from a fully allogeneic BALB/c (H-2<sup>d</sup>) or a syngeneic B6 mouse. At different time points after transplantation, recipient lymph node T cells were isolated and cultured in vitro for 48 hours with donor irradiated spleen cells. **Bottom Table.** B6 mice were transplanted with a skin patch from a BALB/c mouse. Skin allografts were removed at different time points after transplantation. Recipient lymph node T cells were isolated at day 10 post-transplantation and cultured for 48 hours with medium or with either allogeneic (BALB/c) or syngeneic (B6) spleen cells (APCs). In both panel A and B, the frequencies of  $\gamma$ IFN-producing cells were measured by ELISPOT. The results show the numbers of  $\gamma$ IFN spots per million T cells (triplicate wells) isolated obtained in three separate experiments performed with mouse lymph nodes collected and pooled from 3-5 animals.

Figure S7. Cross-dressing results obtained with skin-grafted mice.

|                                         |                         |                    |         |      |      |      |        |      |       |      |       |       |      |      |                                                             |      |                                    |      |                                                                         |     |      |     |     |
|-----------------------------------------|-------------------------|--------------------|---------|------|------|------|--------|------|-------|------|-------|-------|------|------|-------------------------------------------------------------|------|------------------------------------|------|-------------------------------------------------------------------------|-----|------|-----|-----|
| Fig 2D: N=6 per group                   | Day post-tx             |                    | Day 1.5 |      |      |      | Day 4  |      |       |      |       | Day 7 |      |      |                                                             |      | % of recipient cross-dressed cells |      |                                                                         |     |      |     |     |
|                                         | Stage of cross-dressing | Stage 1            | 85      | 72   | 76   | 70   | 71     | 90   | 35    | 50   | 40    | 0     | 15   | 7    | 8                                                           | 10   |                                    | 10   | 7                                                                       | 5   | 10   |     |     |
|                                         |                         | Stage 2            | 10      | 15   | 14   | 11   | 15     | 18   | 55    | 30   | 55    | 40    | 42   | 52   | 10                                                          | 10   |                                    | 10   | 6                                                                       | 4   | 1    |     |     |
|                                         |                         | Stage 3            | 1       | 2    | 6    | 10   | 5      | 2    | 10    | 15   | 3     | 3     | 6    | 10   | 80                                                          | 75   |                                    | 90   | 84                                                                      | 82  | 91   |     |     |
| Fig 3B: N=6-7 per group, per time point | Days post skin graft    |                    | Day 1.5 |      |      |      |        |      | Day 7 |      |       |       |      |      | Number of beads in recipient's LN                           |      |                                    |      |                                                                         |     |      |     |     |
|                                         | Size of beads           | 0.5 um             | 108     | 120  | 104  | 92   | 128    | 89   | 140   | 178  | 158   | 140   | 215  | 186  |                                                             | 129  |                                    |      |                                                                         |     |      |     |     |
|                                         |                         | 2.2 um             | 0       | 0    | 0    | 0    | 0      | 0    | 0     | 55   | 30    | 55    | 15   | 65   |                                                             | 62   |                                    |      |                                                                         |     |      |     |     |
|                                         |                         | 6.0 um             | 0       | 0    | 0    | 0    | 0      | 0    | 0     | 17   | 10    | 20    | 0    | 2    |                                                             | 20   |                                    |      |                                                                         |     |      |     |     |
| Fig 4B: N=5 per group, per time point   | Phenotypic markers      |                    | CD19+   |      |      |      | CD11c+ |      |       |      | CD3+  |       |      |      | -/-                                                         |      |                                    |      | Proportion of phenotypic markers among recipient cross-dressed cells    |     |      |     |     |
|                                         | Days post tx            | Day 1.5            | 5.7     | 1.3  | 3    | 3.1  | 3.4    | 45.9 | 70.9  | 71.3 | 51.3  | 52.9  | 0    | 0    | 0                                                           | 0    | 0                                  | 0.5  |                                                                         | 0.4 | 0    | 0   | 0   |
|                                         |                         | Day 4              | 4.8     | 9.4  | 17.8 | 10.2 | 16.2   | 80   | 63    | 57   | 70    | 65    | 0    | 0    | 0                                                           | 0    | 0                                  | 6.9  |                                                                         | 13  | 15.1 | 7   | 8.6 |
|                                         |                         | Day 7              | 14.6    | 8.4  | 25.3 | 20.4 | 8.6    | 77.1 | 69.9  | 55.3 | 54    | 71.2  | 0    | 0    | 0                                                           | 0    | 0                                  | 12.2 |                                                                         | 7.6 | 1.4  | 5.3 | 4.9 |
| Fig 4C: N=5 per group, per time point   | Days Post Tx            |                    | Day 1.5 |      |      |      | Day 4  |      |       |      | Day 7 |       |      |      | Number of recipient's cross-dressed cells per million in LN |      |                                    |      |                                                                         |     |      |     |     |
|                                         | Recipient/Donor MHC     | R MHC I, D MHC I   | 782     | 705  | 840  | 800  | 830    | 1100 | 1230  | 1150 | 990   | 970   | 1540 | 2105 |                                                             | 1205 | 1010                               | 1400 |                                                                         |     |      |     |     |
|                                         |                         | R MHC II, D MHC I  | 1190    | 1040 | 1000 | 980  | 980    | 330  | 310   | 270  | 280   | 290   | 350  | 330  |                                                             | 320  | 360                                | 320  |                                                                         |     |      |     |     |
|                                         |                         | R MHC II, D MHC II | 970     | 1150 | 950  | 940  | 1010   | 600  | 590   | 570  | 505   | 570   | 1200 | 1005 |                                                             | 1305 | 985                                | 1020 |                                                                         |     |      |     |     |
| Fig 5B: N=5 per group, per time point   | Phenotypic markers      |                    | CD19+   |      |      |      | CD11c+ |      |       |      | CD3+  |       |      |      | -/-                                                         |      |                                    |      | Proportion of phenotypic markers among recipient donor-derived exosomes |     |      |     |     |
|                                         | Days post tx            | Day 1.5            | 0       | 0    | 5    | 0    | 0      | 33   | 0     | 10   | 20    | 25    | 0    | 15   | 25                                                          | 20   | 20                                 | 100  |                                                                         | 75  | 80   | 80  | 75  |
|                                         |                         | Day 4              | 0       | 30   | 10   | 10   | 40     | 0    | 25    | 5    | 0     | 5     | 5    | 10   | 33                                                          | 20   | 25                                 | 50   |                                                                         | 60  | 33   | 50  | 50  |
|                                         |                         | Day 7              | 10      | 20   | 20   | 25   | 25     | 10   | 12    | 14   | 10    | 20    | 20   | 20   | 30                                                          | 30   | 25                                 | 50   |                                                                         | 10  | 70   | 20  | 50  |

This table shows the results obtained using imaging flow cytometry for each skin grafted individual mouse used in our study (each number corresponds to one mouse).



Figure S8. Activation of allospecific T cells by allogeneic exosomes and allo-MHC cross-dressed cells.

In vitro data (Fig. 6B)

| Expt #1 | Media | Self                   | Allogeneic APCs         | CD with allogeneic Splenocytes exosomes | CD with allogeneic B cells exosomes |      |
|---------|-------|------------------------|-------------------------|-----------------------------------------|-------------------------------------|------|
|         | 0     | 7                      | 79                      | 86                                      | 74                                  |      |
|         | 4     | 2                      | 79                      | 52                                      | 79                                  |      |
|         | 3     | 1                      | 108                     | 66                                      | 42                                  |      |
| Expt #2 | Self  | Balb/c (self) exosomes | B6 Splenocytes Exosomes | B6 B cells Exosomes                     | B6 APCs                             |      |
|         | 2     | 0                      | 2                       | 1                                       | 36                                  |      |
|         | 0     | 0                      | 0                       | 0                                       | 28                                  |      |
|         | 6     | 1                      | 4                       | 0                                       | 88                                  |      |
|         |       |                        |                         |                                         | 77                                  |      |
| Expt #3 | Media | Syngeneic exosomes     | Allo exosomes           | Crossdressed cells with allo            | Allo Cells                          | ConA |
|         | 0     | 0                      | 10                      | 204                                     | 680                                 | 948  |
|         | 0     | 13                     | 0                       | 212                                     | 623                                 | 950  |
|         | 1     | 14                     | 15                      | 140                                     | 412                                 | 1022 |
| Expt #4 |       |                        |                         |                                         |                                     |      |
|         | 0     | 0                      | 22                      | 146                                     | 514                                 | 854  |
|         | 2     | 20                     | 12                      | 185                                     | 581                                 | 963  |
|         | 5     | 10                     | 15                      | 149                                     | 432                                 | 1025 |

In vivo data (Fig. 6C)

| Expt #1 | Naïve Balb/c | Syngeneic exosomes | B6 splenocytes | Allograft | Allogeneic exosomes mouse 1 | Allogeneic exosomes mouse 2 | Allogeneic exosomes mouse 3 |
|---------|--------------|--------------------|----------------|-----------|-----------------------------|-----------------------------|-----------------------------|
|         | 3            | 22                 | 447            |           | 407                         | 88                          | 91                          |
|         | 11           | 30                 | 423            |           | 437                         | 16                          | 113                         |
|         | 23           | 44                 | 260            |           | 359                         | 50                          | 87                          |
|         | 59           | 48                 | 267            |           | 407                         | 22                          | 47                          |
|         | 40           | 31                 | 404            |           | 265                         |                             |                             |
|         | 53           | 40                 | 424            |           | 381                         |                             |                             |
| Exp #2  |              |                    |                |           |                             |                             |                             |
|         | 33           | 51                 | 340            |           | 426                         | 70                          | 102                         |
|         | 29           | 40                 | 263            |           | 426                         | 109                         | 131                         |
|         | 35           | 40                 | 272            |           | 438                         | 86                          | 89                          |
|         | 31           | 78                 | 269            |           | 423                         | 92                          | 88                          |
|         |              |                    | 293            |           | 354                         |                             |                             |
|         |              |                    | 286            |           | 433                         |                             |                             |
| Expt #3 |              |                    |                |           |                             |                             |                             |
|         | 16           | 28                 | 425            |           | 1000                        | 75                          | 47                          |
|         | 20           | 29                 | 295            |           | 467                         | 82                          | 48                          |
|         | 33           | 32                 | 366            |           | 1000                        | 66                          | 79                          |
|         | 28           | 20                 | 294            |           | 667                         | 71                          | 33                          |
|         | 12           | 16                 | 343            |           | 729                         | 53                          | 82                          |
|         | 22           | 14                 | 372            |           | 1000                        | 58                          | 69                          |
|         |              | 27                 |                |           | 756                         |                             |                             |
|         |              | 25                 |                |           | 727                         |                             |                             |
|         |              | 22                 |                |           | 741                         |                             |                             |
| Expt #4 |              |                    |                |           |                             |                             |                             |
|         | 37           | 18                 | 398            |           | 487                         | 25                          | 76                          |
|         | 33           | 30                 | 418            |           | 500                         | 27                          | 52                          |
|         | 16           | 35                 | 425            |           | 505                         | 26                          | 56                          |
|         | 53           | 11                 | 442            |           | 481                         | 22                          | 77                          |
|         | 35           | 31                 | 410            |           | 468                         | 52                          | 39                          |
|         | 41           | 26                 | 391            |           | 477                         | 59                          | 84                          |
| Expt #5 |              |                    |                |           |                             |                             |                             |
|         | 41           | 65                 | 68             |           | 606                         | 129                         | 156                         |
|         | 35           | 62                 | 67             |           | 649                         | 108                         | 124                         |
|         | 47           | 29                 | 99             |           | 759                         | 106                         | 123                         |
|         | 54           | 47                 | 56             |           | 605                         | 163                         | 122                         |
|         | 49           | 73                 | 73             |           | 697                         | 117                         | 138                         |
|         | 41           | 55                 | 87             |           | 706                         | 146                         | 112                         |

**Top panel** shows in vitro activation of T cells with exosomes or cross-dressed cells. BALB/c T cells ( $5 \times 10^5$  cells/well) were cultured with B6 allogeneic exosomes or BALB/c cells cross-dressed with allogeneic (H-2<sup>b</sup>) or control syngeneic (H-2<sup>d</sup>) MHC ( $5 \times 10^5$  cells/well) for 48 hours. The frequencies of activated T cells producing  $\gamma$ IFN were measured using ELISPOT. **Bottom panel**: BALB/c mice were injected i.p with allogeneic (B6) or syngeneic (self, BALB/c) exosomes ( $2 \times 10^8$ - $10^9$  vesicles). Fourteen days later, spleen T cells from these mice as well as control naïve mice were collected and stimulated in vitro with irradiated allogeneic B6 APCs for 72 hours. The frequency of T cells secreting  $\gamma$ IFN was measured using ELISPOT. BALB/c mice recipient of a B6 skin graft or injected with B6 spleen cells were tested as positive controls. In panel B and C, the results are expressed as number of  $\gamma$ IFN-producing spots per million T cells obtained from 13 mice tested individually.
